# Supplementary material
Source: PubMed Central journal article supplement (PMC5089523)

## e-Appendix

### *Neuropathological Diagnosis.*

Neuropathologic diagnoses of FTLD-Tau and FTLD-TDP were established according to consensus criteria<sup>1</sup> by expert neuropathologists (J.Q.T.; E.B.L.) using immunohistochemistry with established monoclonal antibodies specific for pathogenic tau (mAb PHF-1)<sup>2</sup> and TDP-43 (mAbs p409/410 or 171)<sup>3</sup>, as previously reported.<sup>4</sup> Twenty patients had a primary FTLD-spectrum neuropathologic diagnosis at autopsy including corticobasal degeneration (CBD; N=2), PSP (N=5), Pick's disease (N=3), referred to here collectively as FTLD-Tau disorders, or FTLD with TDP-43 inclusions (N=10), designated here as FTLD-TDP. Among those individuals with neuropathological confirmation of FTLD, five also had genetic mutations (see below).

### *Genetic Screening.*

DNA was extracted from peripheral blood or brain tissue following the manufacturer's protocols (Flexigene (Qiagen) or QuickGene DNA whole blood kit (Autogen) for blood, and QIASymphony DNA Mini Kit (Qiagen) for brain tissue). Samples were genotyped for the *C9orf72* hexanucleotide-repeat using a modified repeat-primed polymerase-chain reaction and the *MAPT* (exons 1, and 9-13), *GRN* (entire coding region), and *TARDBP* genes were sequenced to identify pathogenic mutations as previously described.<sup>4</sup> Sequencing data was analyzed using Mutation Surveyor software (Soft Genetics, State College, PA). Genetic screening revealed that a total of 40 patients (five also with neuropathological confirmation) had a known pathogenic mutation associated with FTLD-Tau or FTLD-TDP disorders, including mutations in *MAPT* (N=7),<sup>5</sup> as well as *C9orf72* expansions (N=20)<sup>6</sup> or mutations in the *GRN* (N=11),<sup>7</sup> or *TARDBP* (N=2)<sup>8</sup> genes, respectively.

### *Neuropsychological Assessment.*

Letter fluency is a measure of executive control and verbal ability<sup>9</sup> and was assessed by the number of unique words beginning with "F" a patient was able to generate in one minute (excluding proper nouns and numbers). The MMSE is a 30-point questionnaire that evaluates global dementia severity.<sup>10</sup> Forward digit span, a measure of auditory-verbal short-term memory,<sup>11</sup> was assessed with repetition of increasingly longer sequences until the patient erred; the maximum number of digits on a correct trial was recorded. Rey figure copy, a measure of visuospatial constructional ability,<sup>12</sup> required patients to copy a modified Rey complex figure and was scored for accuracy on a 12-point scale. The Boston Naming Test, a measure of confrontational word retrieval, required patients to orally name 30 line drawings; the total number of correct responses made without aid of a stimulus cue was recorded.<sup>13</sup>

### *Neuroimaging Acquisition and Preprocessing.*

High-resolution T1-weighted MPRAGE structural scans were acquired using a 3T Siemens Tim Trio scanner with an 8-channel head coil, with T=1620ms, T<sub>2</sub>=3.09ms, flip angle=15°, 192x256 matrix, and 1mm<sup>3</sup> voxels. T1-weighted MRI images were then preprocessed using ANTs Cortical Thickness software.<sup>14</sup> Briefly, each individual dataset was deformed into a standard local template space in a canonical stereotactic coordinate system. Advanced Normalization Tools (ANTs) provides a highly accurate registration routine using symmetric and topology-preserving diffeomorphic deformations to minimize bias toward the reference space for computing the mappings and to capture the large deformation necessary to aggregate images in a

common space. Then, we used N4 bias correction to minimize heterogeneity,<sup>15</sup> the ANTs Atropos tool to segment images into six tissue classes (cortex, white matter, CSF, subcortical grey structures, brainstem, and cerebellum) using template-based priors and to generate probability maps of each tissue. GM probability images, the sum of the cortical, subcortical, and brainstem probability images, were then transformed into Montreal Neurological Institute (MNI) space, smoothed using a 2 sigma full-width half-maximum Gaussian kernel, and downsampled to 2mm isotropic voxels.

*Post Hoc Analyses for Education and Occupation.*

While our primary analyses use a CR index, we performed *post hoc* analyses to evaluate whether education and occupational attainment alone are similarly related to neuroimaging results (see Table e-2 and Figure e-2). These *post hoc* analyses largely converge with our CR index analyses: when considered separately, educational and occupational category are positively associated with GM density in right frontal cortical regions similar to results obtained when using the CR index. We also observed that each of these measures has some distinct frontal associations with GM. Educational category also positively relates to GM density in the right caudate and left premotor cortex, and occupational category also positively relates to regions in bilateral temporal cortices and in the left frontal cortex. Future work evaluating the difference between these measures would be valuable.

**e-Appendix References**

1. Mackenzie IRA, Neumann M, Bigio EH, et al. Nomenclature and nosology for neuropathologic subtypes of frontotemporal lobar degeneration: an update. *Acta Neuropathol.* Springer-Verlag; 2010;119:1–4.
2. Otvos L, Feiner L, Lang E, Szendrei GI, Goedert M, Lee VM. Monoclonal antibody PHF-1 recognizes tau protein phosphorylated at serine residues 396 and 404. *J Neurosci Res.* Wiley Subscription Services, Inc., A Wiley Company; 1994;39:669–673.
3. Neumann M, Kwong LK, Lee EB, et al. Phosphorylation of S409/410 of TDP-43 is a consistent feature in all sporadic and familial forms of TDP-43 proteinopathies. *Acta Neuropathologica.* 2009;117:137–149.
4. Toledo JB, Van Deerlin VM, Lee EB, et al. A platform for discovery: The University of Pennsylvania Integrated Neurodegenerative Disease Biobank. *Alzheimers Dement.* 2014;10:477–84.e1.
5. Hutton M, Lendon CL, Rizzu P, et al. Association of missense and 5'-splice-site mutations in tau with the inherited dementia FTDP-17. *Nature.* Nature Publishing Group; 1998;393:702–705.
6. DeJesus-Hernandez M, Mackenzie IR, Boeve BF, et al. Expanded GGGGCC hexanucleotide repeat in noncoding region of C9ORF72 causes chromosome 9p-linked FTD and ALS. *Neuron.* 2011;72:245–256.
7. Baker M, Mackenzie IR, Pickering-Brown SM, et al. Mutations in progranulin cause tau-negative frontotemporal dementia linked to chromosome 17. *Nature.* Nature Publishing Group; 2006;442:916–919.
8. Neumann M, Sampathu DM, Kwong LK, et al. Ubiquitinated TDP-43 in frontotemporal lobar degeneration and amyotrophic lateral sclerosis. *Science.* American Association for the Advancement of Science; 2006;314:130–133.
9. Tombaugh TN, Kozak J, Rees L. Normative data stratified by age and education for two measures of verbal fluency: FAS and animal naming. *Arch Clin Neuropsychol.* 1999;14:167–177.
10. Crum RM, Anthony JC, Bassett SS, Folstein MF. Population-Based Norms for the Mini-Mental State Examination by Age and Educational Level. *JAMA.* American Medical Association; 1993;269:2386–2391.
11. Wechsler D. Wechsler Adult Intelligence Scale—Fourth Edition (WAIS–IV) - Statistics Solutions. Epub 2008.
12. Libon DJ, Rascovsky K, Gross RG, et al. The Philadelphia Brief Assessment of Cognition (PBAC): A Validated Screening Measure for Dementia. *The Clinical Neuropsychologist.*

13. Kaplan E, Goodglass H. Weintraub 5: The Boston Naming Test. Philadelphia; 1983.
14. Tustison NJ, Cook PA, Klein A, et al. Large-scale evaluation of ANTs and FreeSurfer cortical thickness measurements. *NeuroImage*. Elsevier Inc; 2014;99:166–179.
15. Tustison NJ, Avants BB, Cook PA, et al. N4ITK: Improved N3 Bias Correction. *IEEE Trans Med Imaging*. IEEE; 2010;29:1310–1320.

**Table e-1:** Results of two whole-brain regression analyses examining CR index relative to

whole-brain GM density in FTLD patients and in controls. We report clusters that survive a  $p < 0.05$  (uncorrected) threshold and cluster extent threshold of  $> 50$  adjacent voxels relative to 10,000 random permutations. Regression analysis in patients included disease duration and age at MRI as nuisance covariates, and regression analysis in healthy controls included age at MRI as a nuisance covariate.

| Neuroanatomic region (BA)                                       | L/R | MNI Coordinates |      |     | <i>p</i> value | Voxels |
|-----------------------------------------------------------------|-----|-----------------|------|-----|----------------|--------|
| <i>Higher GM density associated with higher CR in FTLD:</i>     |     |                 |      |     |                |        |
|                                                                 |     | x               | y    | z   |                |        |
| Dorsolateral Prefrontal Cortex (9)                              | R   | 34              | 36   | 38  | 0.001          | 479    |
| Rostral Frontal Cortex (10)                                     | R   | 36              | 42   | 10  | 0.001          | 455    |
| Visual Association Cortex (18)                                  | L   | -30             | -90  | -10 | 0.001          | 339    |
| Fusiform Gyrus (37)                                             | R   | 60              | -40  | -22 | 0.001          | 296    |
| Visual Association Cortex (19)                                  | R   | 36              | -88  | -14 | 0.001          | 234    |
| Orbital Frontal Cortex (47)                                     | R   | 50              | 28   | -4  | 0.003          | 195    |
| Premotor Cortex (6)                                             | L   | -26             | 0    | 64  | 0.001          | 115    |
| Premotor Cortex (6)                                             | R   | 58              | 2    | 44  | 0.003          | 110    |
| Supramarginal Gyrus (40)                                        | L   | -54             | -40  | 40  | 0.001          | 106    |
| Premotor Cortex (6)                                             | L   | -10             | -106 | 2   | 0.001          | 90     |
| Premotor Cortex (6)                                             | R   | 28              | 6    | 56  | 0.001          | 64     |
| Supramarginal Gyrus (40)                                        | R   | 56              | -40  | 36  | 0.004          | 61     |
| Middle Temporal Gyrus (21)                                      | L   | -62             | -24  | -16 | 0.002          | 60     |
| Cerebellum                                                      | L   | -34             | -86  | 26  | 0.002          | 59     |
| Rostral Frontal Cortex (10)                                     | L   | -44             | 46   | 22  | 0.004          | 59     |
| Middle Temporal Gyrus (21)                                      | L   | -64             | -38  | -8  | 0.003          | 54     |
| Supramarginal Gyrus (40)                                        | R   | 50              | -48  | 44  | 0.004          | 52     |
| <i>Higher GM density associated with higher CR in controls:</i> |     |                 |      |     |                |        |
| Posterior Cingulate Cortex (31)                                 | L   | -8              | -38  | -44 | 0.001          | 392    |
| Anterior Temporal Cortex (38)                                   | R   | 46              | 22   | -30 | 0.001          | 183    |
| Inferior Frontal Gyrus (45)                                     | L   | -56             | 22   | 12  | 0.001          | 117    |
| Visual Association Cortex (18)                                  | L   | -4              | -96  | -14 | 0.001          | 107    |
| Visual Association Cortex (18)                                  | L   | -4              | -96  | 14  | 0.004          | 74     |
| Primary Visual Cortex (17)                                      | R   | 8               | -82  | 8   | 0.005          | 61     |
| Orbital Frontal Cortex (11)                                     | R   | 12              | 34   | -26 | 0.003          | 56     |
| Primary Sensory Cortex (1)                                      | R   | 64              | -18  | 34  | 0.001          | 52     |

**Table e-2:** Results of two regression analyses showing a positive relationship between GM

density and education and occupation in regions from *Analysis 1* in FTLD patients. We report clusters that survive a  $p < 0.05$  (uncorrected) threshold and cluster extent threshold of  $> 50$  adjacent voxels relative to 10,000 random permutations. Regression analysis in patients included disease duration and age at MRI as nuisance covariates.

| Neuroanatomic region (BA)                                           | L/R | MNI Coordinates |     |     | <i>p</i> value | Voxels |
|---------------------------------------------------------------------|-----|-----------------|-----|-----|----------------|--------|
| <i>Higher GM density associated with higher education in FTLD:</i>  |     |                 |     |     |                |        |
|                                                                     |     | x               | y   | z   |                |        |
| Inferior Frontal Gyrus (44)                                         | R   | 58              | 10  | 22  | 0.002          | 316    |
| Rostral Frontal Cortex (10)                                         | R   | 42              | 44  | 10  | 0.001          | 194    |
| Orbital Frontal Cortex (47)                                         | R   | 50              | 34  | -6  | 0.002          | 146    |
| Caudate (48)                                                        | R   | 12              | 8   | 10  | 0.005          | 119    |
| Premotor Cortex (6)                                                 | L   | -50             | 0   | 50  | 0.006          | 66     |
| <i>Higher GM density associated with higher occupation in FTLD:</i> |     |                 |     |     |                |        |
| Orbital Frontal Cortex (47)                                         | R   | 44              | 30  | -14 | 0.001          | 1310   |
| Orbital Frontal Cortex (47)                                         | L   | -40             | 30  | -16 | 0.001          | 508    |
| Orbital Frontal Cortex (11)                                         | R   | 8               | 36  | -24 | 0.001          | 473    |
| Middle Temporal Gyrus (21)                                          | R   | 58              | -8  | -16 | 0.002          | 448    |
| Inferior Frontal Gyrus (44)                                         | R   | 58              | 10  | 20  | 0.001          | 436    |
| Rostral Frontal Cortex (10)                                         | L   | -36             | 56  | 6   | 0.002          | 262    |
| Anterior Temporal Cortex (38)                                       | R   | 30              | 8   | -40 | 0.004          | 135    |
| Anterior Temporal Cortex (38)                                       | L   | -32             | 18  | -36 | 0.007          | 87     |
| Inferior Frontal Gyrus (44)                                         | L   | -62             | -18 | -22 | 0.003          | 74     |
| Dorsolateral Prefrontal Cortex (46)                                 | L   | -40             | 30  | 22  | 0.005          | 65     |
| Orbital Frontal Cortex (11)                                         | L   | -8              | 40  | -24 | 0.007          | 52     |

**Figure e-1.** Results of a regression analysis in healthy controls (N=90) restricted to regions of reduced GM density from *Analysis 1* (pictured in white) demonstrating that GM density in the left inferior frontal gyrus is positively associated with Cognitive Reserve (CR) index (*Analysis 2b*). Color bar represents  $1-p$ -value with yellow representing highest significance.

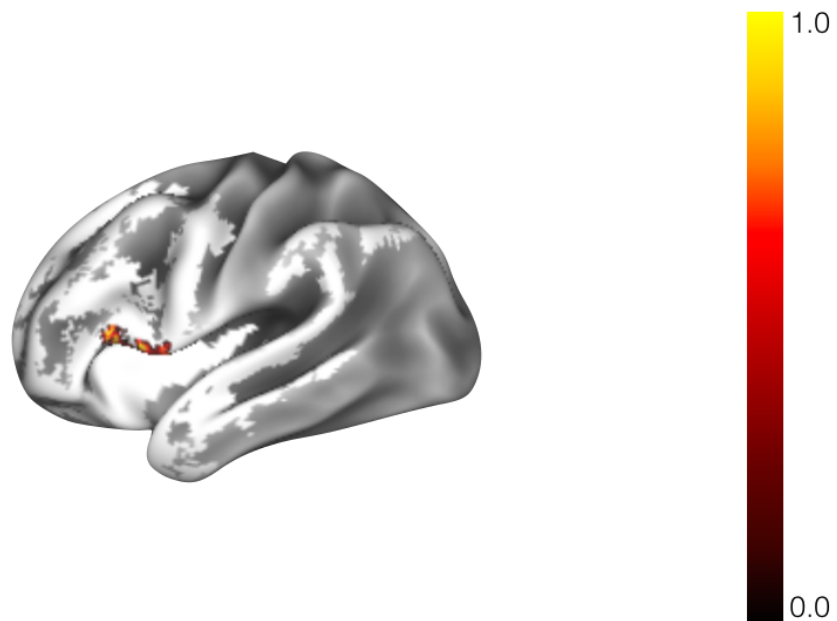

**Figure e-2.** Results of a regression analysis in FTLD patients (N=55) restricted to regions of reduced GM density from *Analysis 1* (pictured in white) demonstrating that when considered separately, educational category (A) and occupational category (B) each are significantly positively associated with right frontal cortex GM density, largely converging with our results using Cognitive Reserve (CR) index as a combined metric of educational and occupational category (*Post hoc Analyses*). Color bar represents  $1-p$ -value with yellow representing highest significance.

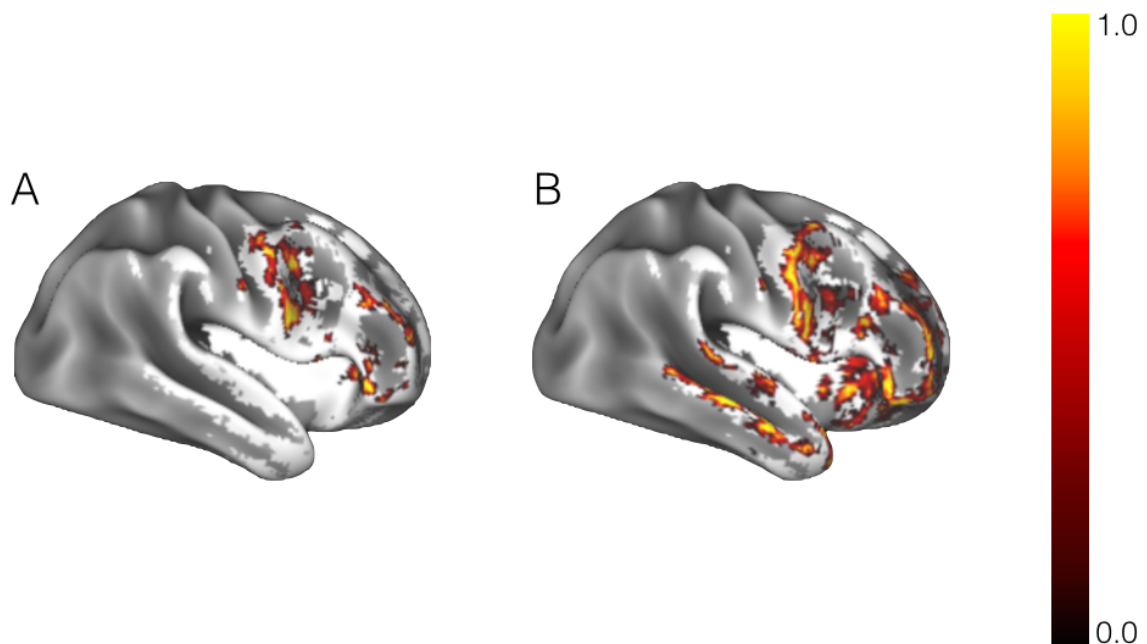

Supplement: supp_WNL.0000000000003250_e-Appendix.pdf [file supp_WNL.0000000000003250_e-Appendix.pdf]
